# Supplementary material for: CPMD investigation of α-RDX and ε-CL-20: the transition of deflagration to detonation depending on the self-produced radicals
Source: Royal Society of Chemistry journal article supplement (doi:10.1039/d0cp00050g), 2020-01-01
Supplement: d0cp00050g1.pdf [file d0cp00050g1.pdf]

## Supplementary Information of

# The CPMD Investigations of $\alpha$ -RDX and $\epsilon$ -CL-20: The transitions of deflagration to detonation depending on the self-produced radicals

Tiantian Zhang<sup>a</sup>, Longjiu Cheng<sup>a</sup>, Jianguo Zhang<sup>\*b</sup>, Kun Wang<sup>\*a</sup>

<sup>a</sup> Department of Chemistry, Anhui University, Hefei, Anhui 230601, P. R. China

<sup>b</sup> State Key Laboratory of Explosion Science and Technology, Beijing Institute of Technology, Beijing 100081 P. R. China

## Contents

|                  |                                                      |              |
|------------------|------------------------------------------------------|--------------|
| <b>Section 1</b> | <b>The atomic force field test for RDX and CL-20</b> | <b>1~10</b>  |
| <b>Section 2</b> | <b>The snapshots of products for RDX and CL-20</b>   | <b>11~12</b> |

---

\*a Corresponding authors: Kun Wang, E-mail: [wangkun@ahu.edu.cn](mailto:wangkun@ahu.edu.cn)

\*b Corresponding authors: Jianguo Zhang, E-mail: [zjgbit@bit.edu.cn](mailto:zjgbit@bit.edu.cn)

## Section 1 The atomic force field test for RDX and CL-20

To satisfy the requirements of the simulation, we test the virtual mass of electronics (700 a.u) and the cut off energy (40 Ry, around 544 eV) to make sure the system is adiabatic with an appropriate force fields for all the atoms of RDX in **Table S1** and CL20 in **Table S2**. The temperature of ions, kinetic energies of virtual electrons and the total electronic energies are converged at 7.87 K,  $1.07 \times 10^{-3}$  a.u, -2807.98 a.u in a 500-step simulation without any thermostat with RDX. The temperature of ions, kinetic energies of virtual electrons and the total electronic energies are converged at 14.56K,  $1.6 \times 10^{-3}$  a.u, -2779.04a.u in a 500-step simulation without any thermostat with CL-20. The tests of atomic force fields of RDX and CL-20 have been listed in Table S1 and Table S2.

**Table S1.** The atomic force field of RDX after the energy initiation

| Atoms | x                      | y                      | z                      | Atoms | x                      | y                      | z                      |
|-------|------------------------|------------------------|------------------------|-------|------------------------|------------------------|------------------------|
| H     | $-1.06 \times 10^{-3}$ | $3.59 \times 10^{-6}$  | $5.25 \times 10^{-4}$  | N     | $5.71 \times 10^{-3}$  | $-1.65 \times 10^{-3}$ | $-9.27 \times 10^{-3}$ |
| H     | $-4.41 \times 10^{-5}$ | $-1.52 \times 10^{-3}$ | $-3.37 \times 10^{-5}$ | N     | $-1.25 \times 10^{-2}$ | $-1.09 \times 10^{-2}$ | $5.73 \times 10^{-3}$  |
| H     | $1.31 \times 10^{-3}$  | $2.80 \times 10^{-4}$  | $-3.30 \times 10^{-3}$ | N     | $-6.09 \times 10^{-3}$ | $-1.15 \times 10^{-2}$ | $7.95 \times 10^{-3}$  |
| H     | $-3.78 \times 10^{-4}$ | $1.84 \times 10^{-3}$  | $4.02 \times 10^{-4}$  | N     | $-6.25 \times 10^{-3}$ | $1.39 \times 10^{-2}$  | $-5.68 \times 10^{-4}$ |
| H     | $1.15 \times 10^{-3}$  | $1.27 \times 10^{-3}$  | $-1.93 \times 10^{-3}$ | N     | $1.54 \times 10^{-2}$  | $-8.28 \times 10^{-3}$ | $4.87 \times 10^{-3}$  |
| H     | $1.50 \times 10^{-3}$  | $-8.97 \times 10^{-5}$ | $1.04 \times 10^{-3}$  | N     | $-6.92 \times 10^{-3}$ | $3.45 \times 10^{-3}$  | $-1.14 \times 10^{-2}$ |
| H     | $-8.22 \times 10^{-5}$ | $-2.31 \times 10^{-3}$ | $2.94 \times 10^{-3}$  | N     | $-6.10 \times 10^{-3}$ | $1.41 \times 10^{-3}$  | $-1.32 \times 10^{-2}$ |
| H     | $-1.55 \times 10^{-3}$ | $-1.63 \times 10^{-3}$ | $-1.95 \times 10^{-3}$ | N     | $1.16 \times 10^{-2}$  | $1.14 \times 10^{-2}$  | $4.45 \times 10^{-3}$  |
| H     | $-8.66 \times 10^{-4}$ | $-8.70 \times 10^{-4}$ | $9.91 \times 10^{-5}$  | N     | $6.39 \times 10^{-3}$  | $1.22 \times 10^{-2}$  | $7.70 \times 10^{-3}$  |
| H     | $-5.45 \times 10^{-5}$ | $2.69 \times 10^{-3}$  | $3.24 \times 10^{-3}$  | N     | $6.37 \times 10^{-3}$  | $-1.40 \times 10^{-2}$ | $-9.41 \times 10^{-4}$ |
| H     | $1.93 \times 10^{-3}$  | $-1.53 \times 10^{-3}$ | $-2.19 \times 10^{-3}$ | N     | $-1.54 \times 10^{-2}$ | $-8.69 \times 10^{-3}$ | $4.77 \times 10^{-3}$  |
| H     | $4.53 \times 10^{-4}$  | $-1.22 \times 10^{-3}$ | $-3.41 \times 10^{-4}$ | N     | $6.63 \times 10^{-3}$  | $3.40 \times 10^{-3}$  | $-9.18 \times 10^{-3}$ |
| H     | $-1.21 \times 10^{-4}$ | $2.57 \times 10^{-3}$  | $3.34 \times 10^{-3}$  | N     | $5.76 \times 10^{-3}$  | $1.56 \times 10^{-3}$  | $-1.26 \times 10^{-2}$ |
| H     | $-8.46 \times 10^{-4}$ | $1.27 \times 10^{-3}$  | $-1.01 \times 10^{-3}$ | N     | $-9.40 \times 10^{-3}$ | $1.11 \times 10^{-2}$  | $4.25 \times 10^{-3}$  |
| H     | $-1.26 \times 10^{-3}$ | $8.08 \times 10^{-4}$  | $9.21 \times 10^{-4}$  | N     | $-6.60 \times 10^{-3}$ | $1.38 \times 10^{-2}$  | $4.34 \times 10^{-3}$  |
| H     | $9.21 \times 10^{-4}$  | $-2.57 \times 10^{-3}$ | $3.74 \times 10^{-4}$  | N     | $-8.12 \times 10^{-3}$ | $-1.35 \times 10^{-2}$ | $1.61 \times 10^{-3}$  |
| H     | $2.91 \times 10^{-4}$  | $-1.40 \times 10^{-3}$ | $-1.39 \times 10^{-3}$ | N     | $1.48 \times 10^{-2}$  | $8.54 \times 10^{-3}$  | $3.18 \times 10^{-3}$  |
| H     | $-1.22 \times 10^{-3}$ | $-3.32 \times 10^{-3}$ | $-4.77 \times 10^{-4}$ | N     | $-6.77 \times 10^{-3}$ | $-3.76 \times 10^{-3}$ | $-1.13 \times 10^{-2}$ |
| H     | $-1.77 \times 10^{-3}$ | $-8.85 \times 10^{-5}$ | $8.99 \times 10^{-5}$  | N     | $-6.08 \times 10^{-3}$ | $-1.62 \times 10^{-3}$ | $-1.37 \times 10^{-2}$ |
| H     | $3.10 \times 10^{-4}$  | $1.51 \times 10^{-3}$  | $-3.93 \times 10^{-4}$ | N     | $1.15 \times 10^{-2}$  | $-1.10 \times 10^{-2}$ | $5.45 \times 10^{-3}$  |
| H     | $5.46 \times 10^{-4}$  | $3.00 \times 10^{-3}$  | $1.28 \times 10^{-3}$  | N     | $2.97 \times 10^{-3}$  | $-1.09 \times 10^{-2}$ | $3.07 \times 10^{-3}$  |
| H     | $1.22 \times 10^{-3}$  | $-2.36 \times 10^{-4}$ | $6.09 \times 10^{-4}$  | N     | $6.66 \times 10^{-3}$  | $1.33 \times 10^{-2}$  | $5.49 \times 10^{-4}$  |
| H     | $-1.74 \times 10^{-3}$ | $1.42 \times 10^{-3}$  | $2.26 \times 10^{-3}$  | N     | $1.50 \times 10^{-2}$  | $-9.43 \times 10^{-3}$ | $5.43 \times 10^{-4}$  |
| H     | $-1.47 \times 10^{-3}$ | $5.54 \times 10^{-4}$  | $2.53 \times 10^{-4}$  | N     | $-5.67 \times 10^{-3}$ | $5.74 \times 10^{-3}$  | $1.17 \times 10^{-2}$  |
| H     | $-1.29 \times 10^{-4}$ | $-2.61 \times 10^{-3}$ | $-3.31 \times 10^{-3}$ | N     | $-6.57 \times 10^{-3}$ | $1.61 \times 10^{-3}$  | $1.46 \times 10^{-2}$  |
| H     | $-4.05 \times 10^{-5}$ | $-1.47 \times 10^{-3}$ | $-1.08 \times 10^{-3}$ | N     | $1.20 \times 10^{-2}$  | $1.12 \times 10^{-2}$  | $-2.73 \times 10^{-3}$ |
| H     | $1.05 \times 10^{-3}$  | $-3.21 \times 10^{-3}$ | $2.01 \times 10^{-4}$  | N     | $5.58 \times 10^{-3}$  | $1.35 \times 10^{-2}$  | $-3.50 \times 10^{-3}$ |
| H     | $2.82 \times 10^{-4}$  | $-3.33 \times 10^{-4}$ | $-5.46 \times 10^{-4}$ | N     | $7.84 \times 10^{-3}$  | $-1.40 \times 10^{-2}$ | $-1.57 \times 10^{-3}$ |
| H     | $-3.71 \times 10^{-4}$ | $1.73 \times 10^{-3}$  | $1.58 \times 10^{-3}$  | N     | $-1.18 \times 10^{-2}$ | $9.94 \times 10^{-3}$  | $-5.30 \times 10^{-3}$ |
| H     | $9.88 \times 10^{-4}$  | $2.95 \times 10^{-3}$  | $3.88 \times 10^{-4}$  | N     | $6.64 \times 10^{-3}$  | $-4.70 \times 10^{-3}$ | $1.18 \times 10^{-2}$  |
| H     | $1.86 \times 10^{-3}$  | $-7.75 \times 10^{-4}$ | $-6.11 \times 10^{-5}$ | N     | $6.51 \times 10^{-3}$  | $-2.91 \times 10^{-3}$ | $1.39 \times 10^{-2}$  |

|   |                        |                        |                        |   |                        |                        |                        |
|---|------------------------|------------------------|------------------------|---|------------------------|------------------------|------------------------|
| H | $-6.62 \times 10^{-4}$ | $-1.62 \times 10^{-3}$ | $3.84 \times 10^{-4}$  | N | $-1.08 \times 10^{-2}$ | $-1.02 \times 10^{-2}$ | $-2.97 \times 10^{-4}$ |
| H | $-1.05 \times 10^{-3}$ | $-3.24 \times 10^{-3}$ | $-1.54 \times 10^{-3}$ | N | $-6.14 \times 10^{-3}$ | $-1.44 \times 10^{-2}$ | $-2.25 \times 10^{-3}$ |
| H | $-1.41 \times 10^{-3}$ | $-3.31 \times 10^{-4}$ | $-3.72 \times 10^{-4}$ | N | $-7.48 \times 10^{-3}$ | $1.36 \times 10^{-2}$  | $-2.48 \times 10^{-3}$ |
| H | $3.00 \times 10^{-4}$  | $1.27 \times 10^{-4}$  | $8.20 \times 10^{-4}$  | N | $1.53 \times 10^{-2}$  | $8.69 \times 10^{-3}$  | $-4.78 \times 10^{-3}$ |
| H | $3.26 \times 10^{-5}$  | $5.93 \times 10^{-5}$  | $-6.52 \times 10^{-4}$ | N | $-7.10 \times 10^{-3}$ | $-3.55 \times 10^{-3}$ | $9.27 \times 10^{-3}$  |
| H | $5.55 \times 10^{-4}$  | $-1.07 \times 10^{-4}$ | $1.91 \times 10^{-4}$  | N | $-5.89 \times 10^{-3}$ | $-1.64 \times 10^{-3}$ | $1.22 \times 10^{-2}$  |
| H | $2.63 \times 10^{-5}$  | $-3.13 \times 10^{-4}$ | $-3.53 \times 10^{-4}$ | N | $1.08 \times 10^{-2}$  | $-1.06 \times 10^{-2}$ | $-4.17 \times 10^{-3}$ |
| H | $6.92 \times 10^{-4}$  | $2.54 \times 10^{-5}$  | $6.64 \times 10^{-4}$  | N | $6.65 \times 10^{-3}$  | $-1.32 \times 10^{-2}$ | $-3.68 \times 10^{-3}$ |
| H | $-4.29 \times 10^{-4}$ | $9.63 \times 10^{-5}$  | $-3.36 \times 10^{-4}$ | N | $8.34 \times 10^{-3}$  | $1.42 \times 10^{-2}$  | $-1.59 \times 10^{-3}$ |
| H | $-3.69 \times 10^{-4}$ | $-4.60 \times 10^{-5}$ | $8.22 \times 10^{-4}$  | N | $-1.46 \times 10^{-2}$ | $-1.07 \times 10^{-2}$ | $-3.16 \times 10^{-3}$ |
| H | $8.57 \times 10^{-5}$  | $-6.50 \times 10^{-5}$ | $-6.37 \times 10^{-4}$ | N | $6.57 \times 10^{-3}$  | $4.61 \times 10^{-3}$  | $1.21 \times 10^{-2}$  |
| H | $-5.72 \times 10^{-4}$ | $2.07 \times 10^{-4}$  | $3.16 \times 10^{-4}$  | N | $6.29 \times 10^{-3}$  | $2.96 \times 10^{-3}$  | $1.38 \times 10^{-2}$  |
| H | $2.90 \times 10^{-5}$  | $4.21 \times 10^{-4}$  | $5.82 \times 10^{-4}$  | N | $-1.16 \times 10^{-2}$ | $8.94 \times 10^{-3}$  | $-1.45 \times 10^{-3}$ |
| H | $-6.27 \times 10^{-4}$ | $-1.65 \times 10^{-5}$ | $7.96 \times 10^{-4}$  | N | $-3.54 \times 10^{-3}$ | $1.30 \times 10^{-2}$  | $-2.04 \times 10^{-3}$ |
| H | $4.78 \times 10^{-4}$  | $-2.34 \times 10^{-4}$ | $-1.93 \times 10^{-4}$ | N | $-7.31 \times 10^{-3}$ | $-1.22 \times 10^{-2}$ | $-1.54 \times 10^{-3}$ |
| H | $-1.97 \times 10^{-4}$ | $-1.39 \times 10^{-4}$ | $-7.45 \times 10^{-4}$ | N | $-1.49 \times 10^{-2}$ | $9.46 \times 10^{-3}$  | $-6.71 \times 10^{-4}$ |
| H | $-3.81 \times 10^{-4}$ | $1.47 \times 10^{-4}$  | $6.07 \times 10^{-4}$  | N | $5.62 \times 10^{-3}$  | $-5.83 \times 10^{-3}$ | $-1.21 \times 10^{-2}$ |
| H | $-5.31 \times 10^{-4}$ | $-1.99 \times 10^{-4}$ | $-1.82 \times 10^{-4}$ | N | $6.42 \times 10^{-3}$  | $-2.00 \times 10^{-3}$ | $-1.46 \times 10^{-2}$ |
| H | $1.17 \times 10^{-4}$  | $-3.26 \times 10^{-4}$ | $6.37 \times 10^{-4}$  | N | $-1.19 \times 10^{-2}$ | $-9.57 \times 10^{-3}$ | $2.62 \times 10^{-3}$  |
| H | $-4.72 \times 10^{-4}$ | $-7.09 \times 10^{-5}$ | $-2.86 \times 10^{-4}$ | N | $-5.38 \times 10^{-3}$ | $-1.14 \times 10^{-2}$ | $3.26 \times 10^{-3}$  |
| H | $4.69 \times 10^{-4}$  | $3.50 \times 10^{-4}$  | $1.82 \times 10^{-4}$  | N | $-8.11 \times 10^{-3}$ | $1.36 \times 10^{-2}$  | $1.49 \times 10^{-3}$  |
| H | $2.25 \times 10^{-4}$  | $7.18 \times 10^{-5}$  | $-5.33 \times 10^{-4}$ | N | $1.32 \times 10^{-2}$  | $-1.10 \times 10^{-2}$ | $5.01 \times 10^{-3}$  |
| H | $5.07 \times 10^{-4}$  | $-1.82 \times 10^{-4}$ | $6.36 \times 10^{-4}$  | N | $-6.47 \times 10^{-3}$ | $4.87 \times 10^{-3}$  | $-1.14 \times 10^{-2}$ |
| H | $4.79 \times 10^{-4}$  | $2.97 \times 10^{-4}$  | $-1.25 \times 10^{-4}$ | N | $-6.49 \times 10^{-3}$ | $2.95 \times 10^{-3}$  | $-1.39 \times 10^{-2}$ |
| H | $-8.57 \times 10^{-5}$ | $3.27 \times 10^{-4}$  | $6.78 \times 10^{-4}$  | N | $1.16 \times 10^{-2}$  | $8.18 \times 10^{-3}$  | $9.72 \times 10^{-4}$  |
| H | $5.21 \times 10^{-4}$  | $6.00 \times 10^{-5}$  | $-3.45 \times 10^{-4}$ | N | $6.56 \times 10^{-3}$  | $1.35 \times 10^{-2}$  | $2.37 \times 10^{-3}$  |
| H | $-3.90 \times 10^{-4}$ | $-1.93 \times 10^{-4}$ | $2.25 \times 10^{-4}$  | N | $7.68 \times 10^{-3}$  | $-1.24 \times 10^{-2}$ | $2.23 \times 10^{-3}$  |
| H | $-2.44 \times 10^{-4}$ | $-6.71 \times 10^{-5}$ | $-8.23 \times 10^{-4}$ | N | $1.71 \times 10^{-3}$  | $3.89 \times 10^{-4}$  | $3.48 \times 10^{-3}$  |
| H | $-2.69 \times 10^{-5}$ | $-2.35 \times 10^{-5}$ | $6.47 \times 10^{-4}$  | N | $2.01 \times 10^{-3}$  | $-2.63 \times 10^{-3}$ | $2.92 \times 10^{-3}$  |
| H | $-5.68 \times 10^{-4}$ | $1.32 \times 10^{-4}$  | $-1.89 \times 10^{-4}$ | N | $4.87 \times 10^{-3}$  | $2.49 \times 10^{-4}$  | $-3.16 \times 10^{-3}$ |
| H | $-4.51 \times 10^{-6}$ | $3.41 \times 10^{-4}$  | $4.04 \times 10^{-4}$  | N | $6.51 \times 10^{-3}$  | $4.53 \times 10^{-3}$  | $1.10 \times 10^{-2}$  |
| H | $-7.70 \times 10^{-4}$ | $-4.95 \times 10^{-6}$ | $-6.24 \times 10^{-4}$ | N | $3.32 \times 10^{-3}$  | $-8.36 \times 10^{-3}$ | $8.66 \times 10^{-3}$  |
| H | $4.33 \times 10^{-4}$  | $-3.13 \times 10^{-5}$ | $3.23 \times 10^{-4}$  | N | $7.34 \times 10^{-3}$  | $-7.19 \times 10^{-4}$ | $-4.05 \times 10^{-3}$ |
| H | $2.08 \times 10^{-4}$  | $-1.40 \times 10^{-4}$ | $-7.38 \times 10^{-4}$ | N | $-2.25 \times 10^{-3}$ | $-2.20 \times 10^{-4}$ | $1.89 \times 10^{-3}$  |
| H | $-7.46 \times 10^{-5}$ | $1.27 \times 10^{-4}$  | $6.69 \times 10^{-4}$  | N | $-1.73 \times 10^{-3}$ | $2.57 \times 10^{-3}$  | $3.05 \times 10^{-3}$  |
| H | $5.53 \times 10^{-4}$  | $-2.85 \times 10^{-4}$ | $-3.33 \times 10^{-4}$ | N | $-5.40 \times 10^{-3}$ | $-2.59 \times 10^{-4}$ | $-3.35 \times 10^{-3}$ |
| H | $-1.12 \times 10^{-4}$ | $-3.15 \times 10^{-4}$ | $-4.75 \times 10^{-4}$ | N | $-7.24 \times 10^{-3}$ | $-4.46 \times 10^{-3}$ | $1.17 \times 10^{-2}$  |
| H | $5.52 \times 10^{-4}$  | $-1.16 \times 10^{-4}$ | $-5.13 \times 10^{-4}$ | N | $-3.39 \times 10^{-3}$ | $9.21 \times 10^{-3}$  | $9.57 \times 10^{-3}$  |
| H | $-4.77 \times 10^{-4}$ | $4.89 \times 10^{-4}$  | $-2.85 \times 10^{-4}$ | N | $-6.37 \times 10^{-3}$ | $3.22 \times 10^{-4}$  | $-2.66 \times 10^{-3}$ |
| H | $2.94 \times 10^{-4}$  | $1.19 \times 10^{-4}$  | $6.88 \times 10^{-4}$  | N | $-2.24 \times 10^{-3}$ | $2.47 \times 10^{-4}$  | $-3.59 \times 10^{-3}$ |
| H | $3.68 \times 10^{-4}$  | $-2.57 \times 10^{-4}$ | $-5.62 \times 10^{-4}$ | N | $-2.14 \times 10^{-3}$ | $-2.83 \times 10^{-3}$ | $-2.46 \times 10^{-3}$ |
| H | $4.74 \times 10^{-4}$  | $2.46 \times 10^{-4}$  | $1.07 \times 10^{-4}$  | O | $-5.52 \times 10^{-3}$ | $9.54 \times 10^{-5}$  | $2.77 \times 10^{-3}$  |
| H | $-2.21 \times 10^{-4}$ | $3.40 \times 10^{-4}$  | $-5.90 \times 10^{-4}$ | O | $-6.74 \times 10^{-3}$ | $5.15 \times 10^{-3}$  | $-1.10 \times 10^{-2}$ |

|   |                        |                        |                        |   |                        |                        |                        |
|---|------------------------|------------------------|------------------------|---|------------------------|------------------------|------------------------|
| H | $4.83 \times 10^{-4}$  | $9.23 \times 10^{-5}$  | $3.15 \times 10^{-4}$  | O | $-4.51 \times 10^{-3}$ | $-8.70 \times 10^{-3}$ | $-6.44 \times 10^{-3}$ |
| H | $-4.08 \times 10^{-4}$ | $-2.29 \times 10^{-4}$ | $-2.09 \times 10^{-4}$ | O | $-7.87 \times 10^{-3}$ | $-1.93 \times 10^{-4}$ | $4.08 \times 10^{-3}$  |
| H | $-2.52 \times 10^{-4}$ | $-7.62 \times 10^{-5}$ | $5.63 \times 10^{-4}$  | O | $2.11 \times 10^{-3}$  | $-2.58 \times 10^{-4}$ | $-2.27 \times 10^{-3}$ |
| H | $-4.67 \times 10^{-4}$ | $2.21 \times 10^{-4}$  | $-6.19 \times 10^{-4}$ | O | $2.02 \times 10^{-3}$  | $3.62 \times 10^{-3}$  | $-2.40 \times 10^{-3}$ |
| H | $-4.43 \times 10^{-4}$ | $-2.69 \times 10^{-4}$ | $1.71 \times 10^{-4}$  | O | $5.21 \times 10^{-3}$  | $-1.39 \times 10^{-4}$ | $1.99 \times 10^{-3}$  |
| H | $2.57 \times 10^{-5}$  | $-3.75 \times 10^{-4}$ | $-6.60 \times 10^{-4}$ | O | $6.96 \times 10^{-3}$  | $-5.42 \times 10^{-3}$ | $-1.08 \times 10^{-2}$ |
| H | $-4.88 \times 10^{-4}$ | $-8.75 \times 10^{-6}$ | $3.90 \times 10^{-4}$  | O | $3.35 \times 10^{-3}$  | $8.89 \times 10^{-3}$  | $-8.15 \times 10^{-3}$ |
| H | $4.02 \times 10^{-4}$  | $2.21 \times 10^{-4}$  | $-1.76 \times 10^{-4}$ | O | $7.19 \times 10^{-3}$  | $2.92 \times 10^{-4}$  | $3.26 \times 10^{-3}$  |
| H | $2.00 \times 10^{-4}$  | $-1.00 \times 10^{-4}$ | $4.95 \times 10^{-4}$  | O | $-1.60 \times 10^{-3}$ | $-3.15 \times 10^{-4}$ | $-3.47 \times 10^{-3}$ |
| H | $4.48 \times 10^{-4}$  | $2.02 \times 10^{-4}$  | $-6.35 \times 10^{-4}$ | O | $-2.07 \times 10^{-3}$ | $2.63 \times 10^{-3}$  | $-2.95 \times 10^{-3}$ |
| H | $5.51 \times 10^{-4}$  | $-3.22 \times 10^{-4}$ | $2.04 \times 10^{-4}$  | O | $-4.96 \times 10^{-3}$ | $-1.82 \times 10^{-4}$ | $3.06 \times 10^{-3}$  |
| H | $-8.24 \times 10^{-5}$ | $-3.00 \times 10^{-4}$ | $-7.34 \times 10^{-4}$ | O | $-6.57 \times 10^{-3}$ | $-4.55 \times 10^{-3}$ | $-1.10 \times 10^{-2}$ |
| H | $6.73 \times 10^{-4}$  | $-4.56 \times 10^{-5}$ | $3.46 \times 10^{-4}$  | O | $-3.28 \times 10^{-3}$ | $8.78 \times 10^{-3}$  | $-8.54 \times 10^{-3}$ |
| H | $-4.78 \times 10^{-4}$ | $1.43 \times 10^{-4}$  | $-2.38 \times 10^{-4}$ | O | $-7.39 \times 10^{-3}$ | $6.69 \times 10^{-4}$  | $4.00 \times 10^{-3}$  |
| H | $-2.85 \times 10^{-4}$ | $1.57 \times 10^{-4}$  | $7.88 \times 10^{-4}$  | O | $2.05 \times 10^{-3}$  | $2.22 \times 10^{-5}$  | $-2.47 \times 10^{-3}$ |
| H | $-3.12 \times 10^{-4}$ | $-1.32 \times 10^{-4}$ | $-6.27 \times 10^{-4}$ | O | $2.03 \times 10^{-3}$  | $-3.27 \times 10^{-3}$ | $-3.31 \times 10^{-3}$ |
| H | $-4.80 \times 10^{-4}$ | $2.82 \times 10^{-4}$  | $5.37 \times 10^{-5}$  | O | $5.24 \times 10^{-3}$  | $1.04 \times 10^{-4}$  | $3.01 \times 10^{-3}$  |
| H | $2.24 \times 10^{-4}$  | $3.98 \times 10^{-4}$  | $-6.14 \times 10^{-4}$ | O | $6.50 \times 10^{-3}$  | $3.73 \times 10^{-3}$  | $-1.26 \times 10^{-2}$ |
| H | $-3.42 \times 10^{-4}$ | $1.10 \times 10^{-4}$  | $4.67 \times 10^{-4}$  | O | $2.89 \times 10^{-3}$  | $-8.77 \times 10^{-3}$ | $-8.60 \times 10^{-3}$ |
| H | $4.78 \times 10^{-4}$  | $-3.26 \times 10^{-4}$ | $2.44 \times 10^{-4}$  | O | $6.74 \times 10^{-3}$  | $-4.44 \times 10^{-4}$ | $3.41 \times 10^{-3}$  |
| H | $-3.85 \times 10^{-4}$ | $2.20 \times 10^{-5}$  | $-8.54 \times 10^{-4}$ | O | $2.24 \times 10^{-3}$  | $-2.97 \times 10^{-4}$ | $3.48 \times 10^{-3}$  |
| H | $1.19 \times 10^{-4}$  | $1.58 \times 10^{-4}$  | $6.20 \times 10^{-4}$  | O | $2.02 \times 10^{-3}$  | $2.37 \times 10^{-3}$  | $2.59 \times 10^{-3}$  |
| C | $-5.88 \times 10^{-4}$ | $-1.93 \times 10^{-4}$ | $-3.69 \times 10^{-4}$ | O | $5.58 \times 10^{-3}$  | $-8.83 \times 10^{-5}$ | $-2.59 \times 10^{-3}$ |
| C | $1.96 \times 10^{-6}$  | $-3.97 \times 10^{-4}$ | $-1.55 \times 10^{-4}$ | O | $7.38 \times 10^{-3}$  | $-4.22 \times 10^{-3}$ | $1.12 \times 10^{-2}$  |
| C | $-7.36 \times 10^{-4}$ | $5.15 \times 10^{-5}$  | $-7.95 \times 10^{-4}$ | O | $4.75 \times 10^{-3}$  | $9.41 \times 10^{-3}$  | $6.57 \times 10^{-3}$  |
| C | $3.63 \times 10^{-4}$  | $2.24 \times 10^{-4}$  | $2.67 \times 10^{-4}$  | O | $6.96 \times 10^{-3}$  | $3.71 \times 10^{-4}$  | $-3.51 \times 10^{-3}$ |
| C | $3.44 \times 10^{-4}$  | $-1.24 \times 10^{-4}$ | $-8.29 \times 10^{-4}$ | O | $-2.12 \times 10^{-3}$ | $3.17 \times 10^{-4}$  | $3.36 \times 10^{-3}$  |
| C | $-8.70 \times 10^{-7}$ | $-4.72 \times 10^{-5}$ | $6.40 \times 10^{-4}$  | O | $-2.00 \times 10^{-3}$ | $-3.32 \times 10^{-3}$ | $2.37 \times 10^{-3}$  |
| C | $5.37 \times 10^{-4}$  | $8.60 \times 10^{-5}$  | $-8.45 \times 10^{-5}$ | O | $-5.41 \times 10^{-3}$ | $2.04 \times 10^{-4}$  | $-1.94 \times 10^{-3}$ |
| C | $5.22 \times 10^{-5}$  | $3.28 \times 10^{-4}$  | $6.12 \times 10^{-4}$  | O | $-7.62 \times 10^{-3}$ | $4.27 \times 10^{-3}$  | $1.05 \times 10^{-2}$  |
| C | $6.30 \times 10^{-4}$  | $-4.07 \times 10^{-5}$ | $-6.89 \times 10^{-4}$ | O | $-2.97 \times 10^{-3}$ | $-9.09 \times 10^{-3}$ | $8.06 \times 10^{-3}$  |
| C | $-3.79 \times 10^{-4}$ | $-2.51 \times 10^{-5}$ | $3.80 \times 10^{-4}$  | O | $-7.09 \times 10^{-3}$ | $-1.45 \times 10^{-4}$ | $-3.90 \times 10^{-3}$ |
| C | $-2.43 \times 10^{-4}$ | $1.29 \times 10^{-4}$  | $-4.76 \times 10^{-4}$ | O | $2.16 \times 10^{-3}$  | $2.94 \times 10^{-4}$  | $2.19 \times 10^{-3}$  |
| C | $-4.83 \times 10^{-4}$ | $-1.61 \times 10^{-4}$ | $6.54 \times 10^{-4}$  | O | $1.98 \times 10^{-3}$  | $-3.31 \times 10^{-3}$ | $2.46 \times 10^{-3}$  |
| C | $-4.99 \times 10^{-4}$ | $2.96 \times 10^{-4}$  | $-8.22 \times 10^{-5}$ | O | $5.09 \times 10^{-3}$  | $2.39 \times 10^{-4}$  | $-1.85 \times 10^{-3}$ |
| C | $8.87 \times 10^{-5}$  | $3.91 \times 10^{-4}$  | $7.36 \times 10^{-4}$  | O | $7.85 \times 10^{-3}$  | $4.54 \times 10^{-3}$  | $1.04 \times 10^{-2}$  |
| C | $-5.61 \times 10^{-4}$ | $5.59 \times 10^{-5}$  | $-3.43 \times 10^{-4}$ | O | $3.96 \times 10^{-3}$  | $-8.79 \times 10^{-3}$ | $6.40 \times 10^{-3}$  |
| C | $4.30 \times 10^{-4}$  | $-1.78 \times 10^{-4}$ | $2.31 \times 10^{-4}$  | O | $7.04 \times 10^{-3}$  | $-9.74 \times 10^{-5}$ | $-4.96 \times 10^{-3}$ |
| C | $3.12 \times 10^{-4}$  | $8.17 \times 10^{-5}$  | $-9.83 \times 10^{-4}$ | O | $-2.26 \times 10^{-3}$ | $-2.33 \times 10^{-4}$ | $3.38 \times 10^{-3}$  |
| C | $-3.98 \times 10^{-5}$ | $3.79 \times 10^{-5}$  | $5.43 \times 10^{-4}$  | O | $-1.98 \times 10^{-3}$ | $3.47 \times 10^{-3}$  | $3.69 \times 10^{-3}$  |
| C | $5.76 \times 10^{-4}$  | $-1.31 \times 10^{-4}$ | $-7.14 \times 10^{-5}$ | O | $-5.95 \times 10^{-3}$ | $2.11 \times 10^{-4}$  | $-2.62 \times 10^{-3}$ |
| C | $-1.30 \times 10^{-4}$ | $-3.95 \times 10^{-4}$ | $6.27 \times 10^{-4}$  | O | $-7.33 \times 10^{-3}$ | $-4.26 \times 10^{-3}$ | $1.11 \times 10^{-2}$  |
| C | $5.13 \times 10^{-4}$  | $9.17 \times 10^{-5}$  | $-7.82 \times 10^{-4}$ | O | $-2.97 \times 10^{-3}$ | $9.13 \times 10^{-3}$  | $8.28 \times 10^{-3}$  |

|   |                        |                        |                        |   |                        |                        |                        |
|---|------------------------|------------------------|------------------------|---|------------------------|------------------------|------------------------|
| C | $-4.46 \times 10^{-4}$ | $1.93 \times 10^{-4}$  | $2.17 \times 10^{-4}$  | O | $-7.23 \times 10^{-3}$ | $-6.15 \times 10^{-4}$ | $-2.18 \times 10^{-3}$ |
| C | $3.49 \times 10^{-4}$  | $-1.32 \times 10^{-4}$ | $8.29 \times 10^{-4}$  | O | $-2.27 \times 10^{-3}$ | $7.61 \times 10^{-4}$  | $-3.12 \times 10^{-3}$ |
| C | $-8.77 \times 10^{-5}$ | $-9.88 \times 10^{-5}$ | $-7.19 \times 10^{-4}$ | O | $-1.63 \times 10^{-3}$ | $-2.51 \times 10^{-3}$ | $-3.65 \times 10^{-3}$ |
| C | $6.35 \times 10^{-4}$  | $2.71 \times 10^{-4}$  | $4.27 \times 10^{-4}$  | O | $-5.24 \times 10^{-3}$ | $3.80 \times 10^{-4}$  | $3.76 \times 10^{-3}$  |
| C | $1.19 \times 10^{-5}$  | $4.30 \times 10^{-4}$  | $1.09 \times 10^{-4}$  | O | $-6.98 \times 10^{-3}$ | $4.29 \times 10^{-3}$  | $-1.15 \times 10^{-2}$ |
| C | $7.35 \times 10^{-4}$  | $2.91 \times 10^{-6}$  | $7.78 \times 10^{-4}$  | O | $-3.39 \times 10^{-3}$ | $-8.98 \times 10^{-3}$ | $-9.33 \times 10^{-3}$ |
| C | $-3.29 \times 10^{-4}$ | $-1.20 \times 10^{-4}$ | $-3.05 \times 10^{-4}$ | O | $-6.92 \times 10^{-3}$ | $7.47 \times 10^{-4}$  | $3.90 \times 10^{-3}$  |
| C | $-3.21 \times 10^{-4}$ | $1.52 \times 10^{-4}$  | $8.24 \times 10^{-4}$  | O | $1.83 \times 10^{-3}$  | $-3.55 \times 10^{-4}$ | $-3.39 \times 10^{-3}$ |
| C | $-4.61 \times 10^{-5}$ | $6.26 \times 10^{-5}$  | $-6.46 \times 10^{-4}$ | O | $1.94 \times 10^{-3}$  | $2.74 \times 10^{-3}$  | $-2.94 \times 10^{-3}$ |
| C | $-5.60 \times 10^{-4}$ | $-1.44 \times 10^{-4}$ | $1.77 \times 10^{-4}$  | O | $5.05 \times 10^{-3}$  | $-8.36 \times 10^{-5}$ | $2.94 \times 10^{-3}$  |
| C | $-8.46 \times 10^{-6}$ | $-3.06 \times 10^{-4}$ | $-3.82 \times 10^{-4}$ | O | $6.59 \times 10^{-3}$  | $-4.52 \times 10^{-3}$ | $-1.09 \times 10^{-2}$ |
| C | $-6.63 \times 10^{-4}$ | $5.82 \times 10^{-5}$  | $6.69 \times 10^{-4}$  | O | $3.29 \times 10^{-3}$  | $8.46 \times 10^{-3}$  | $-8.81 \times 10^{-3}$ |
| C | $3.99 \times 10^{-4}$  | $1.37 \times 10^{-4}$  | $-3.32 \times 10^{-4}$ | O | $7.29 \times 10^{-3}$  | $5.38 \times 10^{-4}$  | $3.89 \times 10^{-3}$  |
| C | $-1.13 \times 10^{-2}$ | $-1.02 \times 10^{-2}$ | $5.31 \times 10^{-3}$  | O | $-2.13 \times 10^{-3}$ | $-2.04 \times 10^{-4}$ | $-2.14 \times 10^{-3}$ |
| C | $6.73 \times 10^{-3}$  | $4.86 \times 10^{-3}$  | $-1.13 \times 10^{-2}$ | O | $-2.04 \times 10^{-3}$ | $3.54 \times 10^{-3}$  | $-2.47 \times 10^{-3}$ |
| C | $6.48 \times 10^{-3}$  | $2.93 \times 10^{-3}$  | $-1.38 \times 10^{-2}$ | O | $-5.17 \times 10^{-3}$ | $-1.72 \times 10^{-4}$ | $1.82 \times 10^{-3}$  |
| C | $-1.21 \times 10^{-2}$ | $1.11 \times 10^{-2}$  | $6.20 \times 10^{-4}$  | O | $-7.69 \times 10^{-3}$ | $-4.58 \times 10^{-3}$ | $-1.03 \times 10^{-2}$ |
| C | $-6.55 \times 10^{-3}$ | $1.39 \times 10^{-2}$  | $2.38 \times 10^{-3}$  | O | $-3.90 \times 10^{-3}$ | $8.90 \times 10^{-3}$  | $-6.33 \times 10^{-3}$ |
| C | $-7.54 \times 10^{-3}$ | $-1.27 \times 10^{-2}$ | $8.23 \times 10^{-4}$  | O | $-7.03 \times 10^{-3}$ | $3.76 \times 10^{-5}$  | $5.23 \times 10^{-3}$  |
| C | $1.50 \times 10^{-2}$  | $9.69 \times 10^{-3}$  | $-1.38 \times 10^{-3}$ | O | $1.68 \times 10^{-3}$  | $1.88 \times 10^{-4}$  | $-3.20 \times 10^{-3}$ |
| C | $-5.59 \times 10^{-3}$ | $-5.90 \times 10^{-3}$ | $-9.43 \times 10^{-3}$ | O | $1.72 \times 10^{-3}$  | $-2.64 \times 10^{-3}$ | $-2.80 \times 10^{-3}$ |
| C | $-6.42 \times 10^{-3}$ | $-2.51 \times 10^{-3}$ | $-1.42 \times 10^{-2}$ | O | $5.68 \times 10^{-3}$  | $2.41 \times 10^{-4}$  | $3.26 \times 10^{-3}$  |
| C | $1.18 \times 10^{-2}$  | $-8.36 \times 10^{-3}$ | $1.23 \times 10^{-3}$  | O | $6.77 \times 10^{-3}$  | $5.12 \times 10^{-3}$  | $-1.14 \times 10^{-2}$ |
| C | $3.10 \times 10^{-3}$  | $-1.05 \times 10^{-2}$ | $2.87 \times 10^{-3}$  | O | $3.02 \times 10^{-3}$  | $-9.50 \times 10^{-3}$ | $-9.30 \times 10^{-3}$ |
| C | $4.93 \times 10^{-3}$  | $1.01 \times 10^{-2}$  | $1.85 \times 10^{-3}$  | O | $7.51 \times 10^{-3}$  | $1.07 \times 10^{-4}$  | $2.57 \times 10^{-3}$  |
| C | $1.48 \times 10^{-2}$  | $-1.07 \times 10^{-2}$ | $-3.37 \times 10^{-3}$ | O | $2.38 \times 10^{-3}$  | $-4.10 \times 10^{-4}$ | $2.98 \times 10^{-3}$  |
| C | $-6.58 \times 10^{-3}$ | $4.46 \times 10^{-3}$  | $1.06 \times 10^{-2}$  | O | $1.58 \times 10^{-3}$  | $2.62 \times 10^{-3}$  | $3.50 \times 10^{-3}$  |
| N | $-5.69 \times 10^{-3}$ | $2.04 \times 10^{-3}$  | $9.78 \times 10^{-3}$  | O | $4.80 \times 10^{-3}$  | $8.68 \times 10^{-5}$  | $-3.51 \times 10^{-3}$ |
| N | $1.22 \times 10^{-2}$  | $1.10 \times 10^{-2}$  | $-5.59 \times 10^{-3}$ | O | $6.96 \times 10^{-3}$  | $-4.26 \times 10^{-3}$ | $1.14 \times 10^{-2}$  |
| N | $6.47 \times 10^{-3}$  | $1.30 \times 10^{-2}$  | $-8.34 \times 10^{-3}$ | O | $3.44 \times 10^{-3}$  | $9.06 \times 10^{-3}$  | $9.42 \times 10^{-3}$  |
| N | $6.60 \times 10^{-3}$  | $-1.38 \times 10^{-2}$ | $5.70 \times 10^{-4}$  | O | $7.11 \times 10^{-3}$  | $-7.55 \times 10^{-4}$ | $-3.89 \times 10^{-3}$ |
| N | $-1.45 \times 10^{-2}$ | $1.05 \times 10^{-2}$  | $-4.11 \times 10^{-3}$ | O | $-1.68 \times 10^{-3}$ | $3.87 \times 10^{-4}$  | $3.55 \times 10^{-3}$  |
| N | $6.46 \times 10^{-3}$  | $-4.02 \times 10^{-3}$ | $9.12 \times 10^{-3}$  | O | $-1.99 \times 10^{-3}$ | $-2.55 \times 10^{-3}$ | $2.84 \times 10^{-3}$  |
| N | $6.21 \times 10^{-3}$  | $-1.63 \times 10^{-3}$ | $1.27 \times 10^{-2}$  | O | $-4.77 \times 10^{-3}$ | $2.60 \times 10^{-4}$  | $-3.10 \times 10^{-3}$ |
| N | $-1.08 \times 10^{-2}$ | $-1.06 \times 10^{-2}$ | $-4.41 \times 10^{-3}$ | O | $-6.34 \times 10^{-3}$ | $5.06 \times 10^{-3}$  | $1.09 \times 10^{-2}$  |
| N | $-6.78 \times 10^{-3}$ | $-1.31 \times 10^{-2}$ | $-7.66 \times 10^{-3}$ | O | $-2.84 \times 10^{-3}$ | $-9.32 \times 10^{-3}$ | $8.99 \times 10^{-3}$  |
| N | $-8.44 \times 10^{-3}$ | $1.43 \times 10^{-2}$  | $-2.08 \times 10^{-3}$ | O | $-7.45 \times 10^{-3}$ | $-8.59 \times 10^{-4}$ | $-3.72 \times 10^{-3}$ |
| N | $1.14 \times 10^{-2}$  | $1.03 \times 10^{-2}$  | $-5.40 \times 10^{-3}$ | O | $5.59 \times 10^{-4}$  | $-1.62 \times 10^{-3}$ | $3.91 \times 10^{-4}$  |
| N | $-6.40 \times 10^{-3}$ | $-4.82 \times 10^{-3}$ | $1.14 \times 10^{-2}$  | O | $8.30 \times 10^{-4}$  | $-3.24 \times 10^{-3}$ | $-1.52 \times 10^{-3}$ |
| N | $-6.63 \times 10^{-3}$ | $-2.89 \times 10^{-3}$ | $1.38 \times 10^{-2}$  | O | $1.35 \times 10^{-3}$  | $-2.53 \times 10^{-4}$ | $-4.01 \times 10^{-4}$ |
| N | $1.20 \times 10^{-2}$  | $-1.10 \times 10^{-2}$ | $-2.96 \times 10^{-4}$ | O | $6.75 \times 10^{-4}$  | $1.99 \times 10^{-3}$  | $1.57 \times 10^{-3}$  |
| N | $6.34 \times 10^{-3}$  | $-1.40 \times 10^{-2}$ | $-2.63 \times 10^{-3}$ | O | $-1.05 \times 10^{-3}$ | $3.39 \times 10^{-3}$  | $2.94 \times 10^{-3}$  |
| N | $7.62 \times 10^{-3}$  | $1.28 \times 10^{-2}$  | $-6.60 \times 10^{-4}$ | O | $-3.23 \times 10^{-4}$ | $2.13 \times 10^{-4}$  | $7.76 \times 10^{-4}$  |

|   |                        |                        |                        |   |                        |                        |                        |
|---|------------------------|------------------------|------------------------|---|------------------------|------------------------|------------------------|
| N | $-1.50 \times 10^{-2}$ | $-9.74 \times 10^{-3}$ | $8.97 \times 10^{-4}$  | O | $-1.17 \times 10^{-3}$ | $-7.28 \times 10^{-4}$ | $1.53 \times 10^{-3}$  |
| N | $6.57 \times 10^{-3}$  | $6.68 \times 10^{-3}$  | $1.41 \times 10^{-2}$  | O | $-1.09 \times 10^{-3}$ | $1.34 \times 10^{-3}$  | $-1.07 \times 10^{-3}$ |
| N | $6.44 \times 10^{-3}$  | $1.19 \times 10^{-3}$  | $1.37 \times 10^{-2}$  | O | $-6.11 \times 10^{-5}$ | $-1.75 \times 10^{-4}$ | $-2.67 \times 10^{-3}$ |
| N | $-1.01 \times 10^{-2}$ | $9.67 \times 10^{-3}$  | $-5.44 \times 10^{-3}$ | O | $2.02 \times 10^{-3}$  | $1.35 \times 10^{-3}$  | $2.08 \times 10^{-3}$  |
| N | $-5.14 \times 10^{-3}$ | $1.46 \times 10^{-2}$  | $-4.15 \times 10^{-3}$ | O | $1.37 \times 10^{-3}$  | $5.54 \times 10^{-5}$  | $2.87 \times 10^{-4}$  |
| N | $-7.08 \times 10^{-3}$ | $-1.44 \times 10^{-2}$ | $-7.02 \times 10^{-4}$ | O | $4.11 \times 10^{-4}$  | $-2.60 \times 10^{-3}$ | $-3.20 \times 10^{-3}$ |
| N | $-1.49 \times 10^{-2}$ | $8.65 \times 10^{-3}$  | $3.12 \times 10^{-3}$  | O | $-5.43 \times 10^{-4}$ | $1.50 \times 10^{-3}$  | $-4.86 \times 10^{-4}$ |
| N | $6.65 \times 10^{-3}$  | $-3.85 \times 10^{-3}$ | $-1.09 \times 10^{-2}$ | O | $-8.41 \times 10^{-4}$ | $3.13 \times 10^{-3}$  | $1.51 \times 10^{-3}$  |

**Table S2.** The atomic force field of CL-20 after the energy initiation

| Atoms | x                      | y                      | z                      | Atoms | x                      | y                      | z                      |
|-------|------------------------|------------------------|------------------------|-------|------------------------|------------------------|------------------------|
| H     | $2.06 \times 10^{-3}$  | $-1.52 \times 10^{-3}$ | $2.35 \times 10^{-3}$  | N     | $1.01 \times 10^{-2}$  | $1.26 \times 10^{-2}$  | $-2.49 \times 10^{-4}$ |
| H     | $-9.28 \times 10^{-5}$ | $-2.38 \times 10^{-3}$ | $-5.27 \times 10^{-4}$ | N     | $-7.68 \times 10^{-3}$ | $-7.63 \times 10^{-3}$ | $7.50 \times 10^{-3}$  |
| H     | $2.47 \times 10^{-3}$  | $1.37 \times 10^{-3}$  | $-1.19 \times 10^{-3}$ | N     | $-7.82 \times 10^{-3}$ | $1.09 \times 10^{-2}$  | $8.67 \times 10^{-3}$  |
| H     | $-3.22 \times 10^{-3}$ | $1.28 \times 10^{-3}$  | $-1.87 \times 10^{-3}$ | N     | $5.53 \times 10^{-3}$  | $-6.42 \times 10^{-4}$ | $-6.80 \times 10^{-3}$ |
| H     | $-7.71 \times 10^{-4}$ | $1.79 \times 10^{-3}$  | $-4.89 \times 10^{-4}$ | N     | $1.04 \times 10^{-3}$  | $-2.31 \times 10^{-3}$ | $-8.06 \times 10^{-3}$ |
| H     | $-1.02 \times 10^{-4}$ | $-1.25 \times 10^{-3}$ | $-1.90 \times 10^{-3}$ | N     | $1.96 \times 10^{-3}$  | $-9.80 \times 10^{-3}$ | $1.43 \times 10^{-2}$  |
| H     | $-1.98 \times 10^{-3}$ | $-1.60 \times 10^{-3}$ | $-2.52 \times 10^{-3}$ | N     | $-1.31 \times 10^{-3}$ | $4.76 \times 10^{-3}$  | $2.44 \times 10^{-3}$  |
| H     | $-3.83 \times 10^{-4}$ | $-2.49 \times 10^{-3}$ | $4.20 \times 10^{-4}$  | N     | $-9.87 \times 10^{-3}$ | $-1.21 \times 10^{-2}$ | $-4.79 \times 10^{-4}$ |
| H     | $-2.17 \times 10^{-3}$ | $1.11 \times 10^{-3}$  | $1.44 \times 10^{-3}$  | N     | $-1.14 \times 10^{-3}$ | $3.37 \times 10^{-3}$  | $1.32 \times 10^{-2}$  |
| H     | $2.86 \times 10^{-3}$  | $1.27 \times 10^{-3}$  | $1.67 \times 10^{-3}$  | N     | $4.27 \times 10^{-3}$  | $9.33 \times 10^{-4}$  | $-2.97 \times 10^{-3}$ |
| H     | $2.12 \times 10^{-3}$  | $1.84 \times 10^{-3}$  | $9.83 \times 10^{-4}$  | N     | $-4.13 \times 10^{-4}$ | $-3.77 \times 10^{-3}$ | $-1.06 \times 10^{-2}$ |
| H     | $3.74 \times 10^{-4}$  | $-1.35 \times 10^{-3}$ | $1.96 \times 10^{-3}$  | N     | $4.52 \times 10^{-3}$  | $1.21 \times 10^{-2}$  | $8.61 \times 10^{-3}$  |
| H     | $-2.05 \times 10^{-3}$ | $1.52 \times 10^{-3}$  | $-2.33 \times 10^{-3}$ | N     | $-3.24 \times 10^{-3}$ | $1.23 \times 10^{-2}$  | $2.32 \times 10^{-3}$  |
| H     | $9.01 \times 10^{-5}$  | $2.37 \times 10^{-3}$  | $5.40 \times 10^{-4}$  | N     | $3.48 \times 10^{-3}$  | $-6.51 \times 10^{-3}$ | $-6.97 \times 10^{-3}$ |
| H     | $-2.48 \times 10^{-3}$ | $-1.37 \times 10^{-3}$ | $1.17 \times 10^{-3}$  | N     | $1.41 \times 10^{-3}$  | $1.06 \times 10^{-2}$  | $-1.03 \times 10^{-2}$ |
| H     | $3.21 \times 10^{-3}$  | $-1.27 \times 10^{-3}$ | $1.87 \times 10^{-3}$  | N     | $8.25 \times 10^{-4}$  | $-5.89 \times 10^{-4}$ | $8.48 \times 10^{-3}$  |
| H     | $7.88 \times 10^{-4}$  | $-1.82 \times 10^{-3}$ | $4.92 \times 10^{-4}$  | N     | $-6.04 \times 10^{-3}$ | $-2.44 \times 10^{-3}$ | $6.95 \times 10^{-3}$  |
| H     | $1.03 \times 10^{-4}$  | $1.23 \times 10^{-3}$  | $1.91 \times 10^{-3}$  | N     | $6.10 \times 10^{-3}$  | $-9.66 \times 10^{-3}$ | $-1.17 \times 10^{-2}$ |
| H     | $2.00 \times 10^{-3}$  | $1.60 \times 10^{-3}$  | $2.53 \times 10^{-3}$  | N     | $-8.43 \times 10^{-3}$ | $5.41 \times 10^{-3}$  | $-5.90 \times 10^{-3}$ |
| H     | $3.75 \times 10^{-4}$  | $2.47 \times 10^{-3}$  | $-4.33 \times 10^{-4}$ | N     | $5.00 \times 10^{-3}$  | $-1.15 \times 10^{-2}$ | $-6.42 \times 10^{-4}$ |
| H     | $2.16 \times 10^{-3}$  | $-1.12 \times 10^{-3}$ | $-1.43 \times 10^{-3}$ | N     | $-8.89 \times 10^{-3}$ | $3.44 \times 10^{-3}$  | $-1.70 \times 10^{-2}$ |
| H     | $-2.87 \times 10^{-3}$ | $-1.27 \times 10^{-3}$ | $-1.67 \times 10^{-3}$ | N     | $2.81 \times 10^{-3}$  | $1.08 \times 10^{-3}$  | $4.64 \times 10^{-3}$  |
| H     | $-2.12 \times 10^{-3}$ | $-1.85 \times 10^{-3}$ | $-9.77 \times 10^{-4}$ | N     | $-5.45 \times 10^{-3}$ | $-3.94 \times 10^{-3}$ | $9.16 \times 10^{-3}$  |
| H     | $-3.65 \times 10^{-4}$ | $1.34 \times 10^{-3}$  | $-1.96 \times 10^{-3}$ | N     | $2.18 \times 10^{-3}$  | $1.21 \times 10^{-2}$  | $-6.60 \times 10^{-3}$ |
| H     | $2.06 \times 10^{-3}$  | $-1.51 \times 10^{-3}$ | $2.34 \times 10^{-3}$  | N     | $-1.01 \times 10^{-2}$ | $-1.26 \times 10^{-2}$ | $1.98 \times 10^{-4}$  |
| H     | $-9.94 \times 10^{-5}$ | $-2.37 \times 10^{-3}$ | $-5.34 \times 10^{-4}$ | N     | $7.68 \times 10^{-3}$  | $7.62 \times 10^{-3}$  | $-7.53 \times 10^{-3}$ |
| H     | $2.47 \times 10^{-3}$  | $1.37 \times 10^{-3}$  | $-1.19 \times 10^{-3}$ | N     | $7.69 \times 10^{-3}$  | $-1.09 \times 10^{-2}$ | $-8.72 \times 10^{-3}$ |
| H     | $-3.21 \times 10^{-3}$ | $1.27 \times 10^{-3}$  | $-1.86 \times 10^{-3}$ | N     | $-5.57 \times 10^{-3}$ | $6.59 \times 10^{-4}$  | $6.81 \times 10^{-3}$  |
| H     | $-7.78 \times 10^{-4}$ | $1.81 \times 10^{-3}$  | $-4.86 \times 10^{-4}$ | N     | $-1.08 \times 10^{-3}$ | $2.31 \times 10^{-3}$  | $8.04 \times 10^{-3}$  |
| H     | $-1.05 \times 10^{-4}$ | $-1.24 \times 10^{-3}$ | $-1.90 \times 10^{-3}$ | N     | $-1.94 \times 10^{-3}$ | $9.79 \times 10^{-3}$  | $-1.43 \times 10^{-2}$ |
| H     | $-1.99 \times 10^{-3}$ | $-1.59 \times 10^{-3}$ | $-2.51 \times 10^{-3}$ | N     | $1.15 \times 10^{-3}$  | $-4.65 \times 10^{-3}$ | $-2.44 \times 10^{-3}$ |
| H     | $-3.86 \times 10^{-4}$ | $-2.48 \times 10^{-3}$ | $4.21 \times 10^{-4}$  | N     | $9.90 \times 10^{-3}$  | $1.21 \times 10^{-2}$  | $4.72 \times 10^{-4}$  |
| H     | $-2.16 \times 10^{-3}$ | $1.12 \times 10^{-3}$  | $1.45 \times 10^{-3}$  | N     | $1.04 \times 10^{-3}$  | $-3.41 \times 10^{-3}$ | $-1.33 \times 10^{-2}$ |
| H     | $2.86 \times 10^{-3}$  | $1.27 \times 10^{-3}$  | $1.67 \times 10^{-3}$  | N     | $-4.36 \times 10^{-3}$ | $3.64 \times 10^{-3}$  | $2.95 \times 10^{-3}$  |
| H     | $2.13 \times 10^{-3}$  | $1.84 \times 10^{-3}$  | $9.79 \times 10^{-4}$  | N     | $3.67 \times 10^{-4}$  | $3.77 \times 10^{-3}$  | $1.06 \times 10^{-2}$  |
| H     | $3.70 \times 10^{-4}$  | $-1.35 \times 10^{-3}$ | $1.96 \times 10^{-3}$  | N     | $-4.54 \times 10^{-3}$ | $-1.21 \times 10^{-2}$ | $-8.67 \times 10^{-3}$ |
| H     | $-2.05 \times 10^{-3}$ | $1.52 \times 10^{-3}$  | $-2.34 \times 10^{-3}$ | N     | $3.35 \times 10^{-3}$  | $-1.23 \times 10^{-2}$ | $-2.27 \times 10^{-3}$ |
| H     | $8.99 \times 10^{-5}$  | $2.37 \times 10^{-3}$  | $5.31 \times 10^{-4}$  | N     | $-3.37 \times 10^{-3}$ | $6.50 \times 10^{-3}$  | $7.02 \times 10^{-3}$  |
| H     | $-2.49 \times 10^{-3}$ | $-1.38 \times 10^{-3}$ | $1.18 \times 10^{-3}$  | N     | $-1.28 \times 10^{-3}$ | $-1.06 \times 10^{-2}$ | $1.03 \times 10^{-2}$  |
| H     | $3.21 \times 10^{-3}$  | $-1.27 \times 10^{-3}$ | $1.87 \times 10^{-3}$  | N     | $-7.97 \times 10^{-4}$ | $5.82 \times 10^{-4}$  | $-8.46 \times 10^{-3}$ |
| H     | $7.86 \times 10^{-4}$  | $-1.82 \times 10^{-3}$ | $4.93 \times 10^{-4}$  | N     | $6.05 \times 10^{-3}$  | $2.43 \times 10^{-3}$  | $-6.92 \times 10^{-3}$ |

|   |                        |                        |                         |   |                        |                        |                        |
|---|------------------------|------------------------|-------------------------|---|------------------------|------------------------|------------------------|
| H | $1.03 \times 10^{-4}$  | $1.24 \times 10^{-3}$  | $1.91 \times 10^{-3}$   | N | $-6.08 \times 10^{-3}$ | $9.68 \times 10^{-3}$  | $1.18 \times 10^{-2}$  |
| H | $1.97 \times 10^{-3}$  | $1.60 \times 10^{-3}$  | $2.52 \times 10^{-3}$   | N | $8.30 \times 10^{-3}$  | $-5.52 \times 10^{-3}$ | $6.05 \times 10^{-3}$  |
| H | $3.77 \times 10^{-4}$  | $2.49 \times 10^{-3}$  | $-4.32 \times 10^{-4}$  | N | $-5.06 \times 10^{-3}$ | $1.15 \times 10^{-2}$  | $7.06 \times 10^{-4}$  |
| H | $2.19 \times 10^{-3}$  | $-1.13 \times 10^{-3}$ | $-1.43 \times 10^{-3}$  | N | $8.99 \times 10^{-3}$  | $-3.42 \times 10^{-3}$ | $1.71 \times 10^{-2}$  |
| H | $-2.86 \times 10^{-3}$ | $-1.27 \times 10^{-3}$ | $-1.67 \times 10^{-3}$  | N | $-2.61 \times 10^{-3}$ | $-1.01 \times 10^{-3}$ | $-4.52 \times 10^{-3}$ |
| H | $-2.11 \times 10^{-3}$ | $-1.84 \times 10^{-3}$ | $-9.91 \times 10^{-4}$  | N | $5.44 \times 10^{-3}$  | $3.93 \times 10^{-3}$  | $-9.18 \times 10^{-3}$ |
| H | $-3.75 \times 10^{-4}$ | $1.34 \times 10^{-3}$  | $-1.97 \times 10^{-3}$  | N | $-2.18 \times 10^{-3}$ | $-1.21 \times 10^{-2}$ | $6.57 \times 10^{-3}$  |
| C | $-6.03 \times 10^{-5}$ | $2.97 \times 10^{-4}$  | $1.99 \times 10^{-4}$   | O | $7.87 \times 10^{-3}$  | $-8.26 \times 10^{-3}$ | $-7.63 \times 10^{-3}$ |
| C | $-5.47 \times 10^{-4}$ | $-2.11 \times 10^{-4}$ | $2.24 \times 10^{-4}$   | O | $2.67 \times 10^{-3}$  | $-2.72 \times 10^{-3}$ | $-9.11 \times 10^{-4}$ |
| C | $-2.17 \times 10^{-4}$ | $-1.59 \times 10^{-4}$ | $-4.67 \times 10^{-4}$  | O | $4.60 \times 10^{-3}$  | $-8.20 \times 10^{-3}$ | $5.80 \times 10^{-4}$  |
| C | $-4.83 \times 10^{-5}$ | $7.83 \times 10^{-5}$  | $3.05 \times 10^{-5}$   | O | $4.26 \times 10^{-3}$  | $-3.57 \times 10^{-3}$ | $6.64 \times 10^{-3}$  |
| C | $3.11 \times 10^{-4}$  | $2.04 \times 10^{-4}$  | $4.34 \times 10^{-4}$   | O | $-6.39 \times 10^{-3}$ | $8.10 \times 10^{-3}$  | $-2.49 \times 10^{-3}$ |
| C | $1.48 \times 10^{-4}$  | $-4.40 \times 10^{-4}$ | $7.50 \times 10^{-5}$   | O | $-2.67 \times 10^{-3}$ | $5.26 \times 10^{-3}$  | $-9.07 \times 10^{-4}$ |
| C | $4.24 \times 10^{-5}$  | $3.04 \times 10^{-4}$  | $-1.99 \times 10^{-4}$  | O | $9.22 \times 10^{-5}$  | $4.92 \times 10^{-3}$  | $-1.09 \times 10^{-2}$ |
| C | $5.36 \times 10^{-4}$  | $-2.04 \times 10^{-4}$ | $-2.53 \times 10^{-4}$  | O | $1.63 \times 10^{-3}$  | $1.21 \times 10^{-3}$  | $-6.13 \times 10^{-4}$ |
| C | $2.17 \times 10^{-4}$  | $-1.60 \times 10^{-4}$ | $4.97 \times 10^{-4}$   | O | $-1.80 \times 10^{-2}$ | $-7.26 \times 10^{-4}$ | $-5.41 \times 10^{-3}$ |
| C | $5.79 \times 10^{-5}$  | $1.06 \times 10^{-4}$  | $5.29 \times 10^{-07}$  | O | $-9.95 \times 10^{-4}$ | $5.83 \times 10^{-4}$  | $-3.28 \times 10^{-4}$ |
| C | $-2.88 \times 10^{-4}$ | $2.12 \times 10^{-4}$  | $-4.55 \times 10^{-4}$  | O | $-3.84 \times 10^{-3}$ | $-1.13 \times 10^{-2}$ | $5.11 \times 10^{-3}$  |
| C | $-1.84 \times 10^{-4}$ | $-4.52 \times 10^{-4}$ | $-9.27 \times 10^{-5}$  | O | $-1.36 \times 10^{-4}$ | $-3.17 \times 10^{-3}$ | $4.53 \times 10^{-3}$  |
| C | $5.38 \times 10^{-5}$  | $-2.96 \times 10^{-4}$ | $-1.98 \times 10^{-4}$  | O | $-4.34 \times 10^{-3}$ | $-8.87 \times 10^{-3}$ | $6.85 \times 10^{-3}$  |
| C | $5.47 \times 10^{-4}$  | $2.12 \times 10^{-4}$  | $-2.26 \times 10^{-4}$  | O | $-5.74 \times 10^{-3}$ | $-2.68 \times 10^{-3}$ | $2.15 \times 10^{-4}$  |
| C | $2.14 \times 10^{-4}$  | $1.60 \times 10^{-4}$  | $4.65 \times 10^{-4}$   | O | $-7.81 \times 10^{-3}$ | $-7.80 \times 10^{-3}$ | $-1.58 \times 10^{-3}$ |
| C | $5.14 \times 10^{-5}$  | $-8.01 \times 10^{-5}$ | $-3.30 \times 10^{-5}$  | O | $-4.78 \times 10^{-4}$ | $-3.22 \times 10^{-3}$ | $-5.71 \times 10^{-3}$ |
| C | $-3.07 \times 10^{-4}$ | $-2.02 \times 10^{-4}$ | $-4.39 \times 10^{-4}$  | O | $3.28 \times 10^{-3}$  | $7.80 \times 10^{-3}$  | $1.05 \times 10^{-3}$  |
| C | $-1.45 \times 10^{-4}$ | $4.44 \times 10^{-4}$  | $-7.44 \times 10^{-5}$  | O | $6.47 \times 10^{-3}$  | $5.65 \times 10^{-3}$  | $2.00 \times 10^{-3}$  |
| C | $-4.59 \times 10^{-5}$ | $-3.05 \times 10^{-4}$ | $1.95 \times 10^{-4}$   | O | $4.78 \times 10^{-3}$  | $3.51 \times 10^{-3}$  | $1.28 \times 10^{-2}$  |
| C | $-5.37 \times 10^{-4}$ | $2.04 \times 10^{-4}$  | $2.55 \times 10^{-4}$   | O | $2.36 \times 10^{-3}$  | $1.21 \times 10^{-3}$  | $2.01 \times 10^{-3}$  |
| C | $-2.17 \times 10^{-4}$ | $1.61 \times 10^{-4}$  | $-4.99 \times 10^{-4}$  | O | $1.39 \times 10^{-2}$  | $-9.32 \times 10^{-4}$ | $5.27 \times 10^{-3}$  |
| C | $-5.89 \times 10^{-5}$ | $-1.01 \times 10^{-4}$ | $4.35 \times 10^{-07}$  | O | $4.09 \times 10^{-3}$  | $4.20 \times 10^{-4}$  | $1.16 \times 10^{-3}$  |
| C | $2.90 \times 10^{-4}$  | $-2.09 \times 10^{-4}$ | $4.49 \times 10^{-4}$   | O | $7.34 \times 10^{-3}$  | $-1.13 \times 10^{-2}$ | $-4.45 \times 10^{-3}$ |
| C | $1.85 \times 10^{-4}$  | $4.52 \times 10^{-4}$  | $8.95 \times 10^{-5}$   | O | $4.44 \times 10^{-3}$  | $-3.23 \times 10^{-3}$ | $-3.37 \times 10^{-3}$ |
| C | $-5.84 \times 10^{-5}$ | $2.97 \times 10^{-4}$  | $1.96 \times 10^{-4}$   | O | $-7.86 \times 10^{-3}$ | $8.25 \times 10^{-3}$  | $7.65 \times 10^{-3}$  |
| C | $-5.50 \times 10^{-4}$ | $-2.09 \times 10^{-4}$ | $2.24 \times 10^{-4}$   | O | $-2.67 \times 10^{-3}$ | $2.72 \times 10^{-3}$  | $8.48 \times 10^{-4}$  |
| C | $-2.18 \times 10^{-4}$ | $-1.57 \times 10^{-4}$ | $-4.71 \times 10^{-4}$  | O | $-4.60 \times 10^{-3}$ | $8.18 \times 10^{-3}$  | $-5.93 \times 10^{-4}$ |
| C | $-4.95 \times 10^{-5}$ | $7.67 \times 10^{-5}$  | $3.01 \times 10^{-5}$   | O | $-4.22 \times 10^{-3}$ | $3.59 \times 10^{-3}$  | $-6.63 \times 10^{-3}$ |
| C | $3.08 \times 10^{-4}$  | $2.00 \times 10^{-4}$  | $4.36 \times 10^{-4}$   | O | $6.41 \times 10^{-3}$  | $-8.10 \times 10^{-3}$ | $2.49 \times 10^{-3}$  |
| C | $1.46 \times 10^{-4}$  | $-4.42 \times 10^{-4}$ | $7.46 \times 10^{-5}$   | O | $2.68 \times 10^{-3}$  | $-5.27 \times 10^{-3}$ | $8.94 \times 10^{-4}$  |
| C | $4.18 \times 10^{-5}$  | $3.04 \times 10^{-4}$  | $-1.97 \times 10^{-4}$  | O | $-1.05 \times 10^{-4}$ | $-4.88 \times 10^{-3}$ | $1.09 \times 10^{-2}$  |
| C | $5.36 \times 10^{-4}$  | $-2.06 \times 10^{-4}$ | $-2.53 \times 10^{-4}$  | O | $-1.61 \times 10^{-3}$ | $-1.23 \times 10^{-3}$ | $6.04 \times 10^{-4}$  |
| C | $2.17 \times 10^{-4}$  | $-1.61 \times 10^{-4}$ | $4.98 \times 10^{-4}$   | O | $1.80 \times 10^{-2}$  | $6.94 \times 10^{-4}$  | $5.41 \times 10^{-3}$  |
| C | $6.03 \times 10^{-5}$  | $1.06 \times 10^{-4}$  | $-6.64 \times 10^{-07}$ | O | $9.96 \times 10^{-4}$  | $-5.25 \times 10^{-4}$ | $3.29 \times 10^{-4}$  |
| C | $-2.86 \times 10^{-4}$ | $2.13 \times 10^{-4}$  | $-4.55 \times 10^{-4}$  | O | $3.84 \times 10^{-3}$  | $1.13 \times 10^{-2}$  | $-5.12 \times 10^{-3}$ |
| C | $-1.86 \times 10^{-4}$ | $-4.49 \times 10^{-4}$ | $-9.33 \times 10^{-5}$  | O | $1.16 \times 10^{-4}$  | $3.17 \times 10^{-3}$  | $-4.57 \times 10^{-3}$ |



|   |                        |                        |                        |   |                        |                        |                        |
|---|------------------------|------------------------|------------------------|---|------------------------|------------------------|------------------------|
| C | $5.35 \times 10^{-5}$  | $-2.96 \times 10^{-4}$ | $-1.98 \times 10^{-4}$ | O | $4.35 \times 10^{-3}$  | $8.87 \times 10^{-3}$  | $-6.84 \times 10^{-3}$ |
| C | $5.49 \times 10^{-4}$  | $2.13 \times 10^{-4}$  | $-2.23 \times 10^{-4}$ | O | $5.75 \times 10^{-3}$  | $2.68 \times 10^{-3}$  | $-2.23 \times 10^{-4}$ |
| C | $2.13 \times 10^{-4}$  | $1.61 \times 10^{-4}$  | $4.65 \times 10^{-4}$  | O | $7.74 \times 10^{-3}$  | $7.83 \times 10^{-3}$  | $1.57 \times 10^{-3}$  |
| C | $5.01 \times 10^{-5}$  | $-8.04 \times 10^{-5}$ | $-3.26 \times 10^{-5}$ | O | $4.93 \times 10^{-4}$  | $3.24 \times 10^{-3}$  | $5.73 \times 10^{-3}$  |
| C | $-3.07 \times 10^{-4}$ | $-2.01 \times 10^{-4}$ | $-4.43 \times 10^{-4}$ | O | $-3.28 \times 10^{-3}$ | $-7.80 \times 10^{-3}$ | $-1.05 \times 10^{-3}$ |
| C | $-1.43 \times 10^{-4}$ | $4.45 \times 10^{-4}$  | $-7.34 \times 10^{-5}$ | O | $-6.44 \times 10^{-3}$ | $-5.65 \times 10^{-3}$ | $-1.97 \times 10^{-3}$ |
| C | $-3.92 \times 10^{-5}$ | $-3.04 \times 10^{-4}$ | $1.99 \times 10^{-4}$  | O | $-4.81 \times 10^{-3}$ | $-3.54 \times 10^{-3}$ | $-1.28 \times 10^{-2}$ |
| C | $-5.34 \times 10^{-4}$ | $2.05 \times 10^{-4}$  | $2.55 \times 10^{-4}$  | O | $-2.34 \times 10^{-3}$ | $-1.20 \times 10^{-3}$ | $-1.99 \times 10^{-3}$ |
| C | $-2.20 \times 10^{-4}$ | $1.62 \times 10^{-4}$  | $-5.00 \times 10^{-4}$ | O | $-1.39 \times 10^{-2}$ | $7.80 \times 10^{-4}$  | $-5.38 \times 10^{-3}$ |
| C | $-5.90 \times 10^{-5}$ | $-1.04 \times 10^{-4}$ | $1.90 \times 10^{-6}$  | O | $-4.08 \times 10^{-3}$ | $-4.24 \times 10^{-4}$ | $-1.17 \times 10^{-3}$ |
| C | $2.92 \times 10^{-4}$  | $-2.12 \times 10^{-4}$ | $4.54 \times 10^{-4}$  | O | $-7.35 \times 10^{-3}$ | $1.13 \times 10^{-2}$  | $4.45 \times 10^{-3}$  |
| C | $1.89 \times 10^{-4}$  | $4.49 \times 10^{-4}$  | $9.43 \times 10^{-5}$  | O | $-4.50 \times 10^{-3}$ | $3.24 \times 10^{-3}$  | $3.33 \times 10^{-3}$  |
| N | $1.01 \times 10^{-2}$  | $1.26 \times 10^{-2}$  | $-1.60 \times 10^{-4}$ | O | $7.89 \times 10^{-3}$  | $-8.25 \times 10^{-3}$ | $-7.62 \times 10^{-3}$ |
| N | $-7.67 \times 10^{-3}$ | $-7.62 \times 10^{-3}$ | $7.55 \times 10^{-3}$  | O | $2.67 \times 10^{-3}$  | $-2.71 \times 10^{-3}$ | $-9.12 \times 10^{-4}$ |
| N | $-7.76 \times 10^{-3}$ | $1.09 \times 10^{-2}$  | $8.69 \times 10^{-3}$  | O | $4.55 \times 10^{-3}$  | $-8.21 \times 10^{-3}$ | $5.47 \times 10^{-4}$  |
| N | $5.53 \times 10^{-3}$  | $-6.51 \times 10^{-4}$ | $-6.83 \times 10^{-3}$ | O | $4.26 \times 10^{-3}$  | $-3.59 \times 10^{-3}$ | $6.63 \times 10^{-3}$  |
| N | $1.02 \times 10^{-3}$  | $-2.30 \times 10^{-3}$ | $-8.06 \times 10^{-3}$ | O | $-6.42 \times 10^{-3}$ | $8.09 \times 10^{-3}$  | $-2.49 \times 10^{-3}$ |
| N | $1.94 \times 10^{-3}$  | $-9.81 \times 10^{-3}$ | $1.43 \times 10^{-2}$  | O | $-2.67 \times 10^{-3}$ | $5.27 \times 10^{-3}$  | $-9.08 \times 10^{-4}$ |
| N | $-1.29 \times 10^{-3}$ | $4.76 \times 10^{-3}$  | $2.46 \times 10^{-3}$  | O | $6.08 \times 10^{-5}$  | $4.92 \times 10^{-3}$  | $-1.09 \times 10^{-2}$ |
| N | $-9.91 \times 10^{-3}$ | $-1.21 \times 10^{-2}$ | $-4.37 \times 10^{-4}$ | O | $1.61 \times 10^{-3}$  | $1.22 \times 10^{-3}$  | $-6.17 \times 10^{-4}$ |
| N | $-1.13 \times 10^{-3}$ | $3.36 \times 10^{-3}$  | $1.33 \times 10^{-2}$  | O | $-1.80 \times 10^{-2}$ | $-7.13 \times 10^{-4}$ | $-5.41 \times 10^{-3}$ |
| N | $4.33 \times 10^{-3}$  | $8.58 \times 10^{-4}$  | $-2.95 \times 10^{-3}$ | O | $-1.01 \times 10^{-3}$ | $5.42 \times 10^{-4}$  | $-3.44 \times 10^{-4}$ |
| N | $-4.76 \times 10^{-4}$ | $-3.78 \times 10^{-3}$ | $-1.06 \times 10^{-2}$ | O | $-3.85 \times 10^{-3}$ | $-1.13 \times 10^{-2}$ | $5.11 \times 10^{-3}$  |
| N | $4.40 \times 10^{-3}$  | $1.21 \times 10^{-2}$  | $8.56 \times 10^{-3}$  | O | $-1.23 \times 10^{-4}$ | $-3.18 \times 10^{-3}$ | $4.54 \times 10^{-3}$  |
| N | $-3.26 \times 10^{-3}$ | $1.23 \times 10^{-2}$  | $2.31 \times 10^{-3}$  | O | $-4.34 \times 10^{-3}$ | $-8.86 \times 10^{-3}$ | $6.85 \times 10^{-3}$  |
| N | $3.47 \times 10^{-3}$  | $-6.50 \times 10^{-3}$ | $-6.98 \times 10^{-3}$ | O | $-5.74 \times 10^{-3}$ | $-2.68 \times 10^{-3}$ | $2.22 \times 10^{-4}$  |
| N | $1.38 \times 10^{-3}$  | $1.06 \times 10^{-2}$  | $-1.03 \times 10^{-2}$ | O | $-7.75 \times 10^{-3}$ | $-7.81 \times 10^{-3}$ | $-1.56 \times 10^{-3}$ |
| N | $8.29 \times 10^{-4}$  | $-5.73 \times 10^{-4}$ | $8.47 \times 10^{-3}$  | O | $-4.59 \times 10^{-4}$ | $-3.23 \times 10^{-3}$ | $-5.72 \times 10^{-3}$ |
| N | $-6.05 \times 10^{-3}$ | $-2.44 \times 10^{-3}$ | $6.95 \times 10^{-3}$  | O | $3.28 \times 10^{-3}$  | $7.80 \times 10^{-3}$  | $1.06 \times 10^{-3}$  |
| N | $6.15 \times 10^{-3}$  | $-9.65 \times 10^{-3}$ | $-1.17 \times 10^{-2}$ | O | $6.47 \times 10^{-3}$  | $5.64 \times 10^{-3}$  | $2.00 \times 10^{-3}$  |
| N | $-8.40 \times 10^{-3}$ | $5.44 \times 10^{-3}$  | $-5.89 \times 10^{-3}$ | O | $4.76 \times 10^{-3}$  | $3.50 \times 10^{-3}$  | $1.28 \times 10^{-2}$  |
| N | $5.01 \times 10^{-3}$  | $-1.15 \times 10^{-2}$ | $-6.17 \times 10^{-4}$ | O | $2.37 \times 10^{-3}$  | $1.22 \times 10^{-3}$  | $2.00 \times 10^{-3}$  |
| N | $-8.95 \times 10^{-3}$ | $3.49 \times 10^{-3}$  | $-1.71 \times 10^{-2}$ | O | $1.39 \times 10^{-2}$  | $-7.87 \times 10^{-4}$ | $5.37 \times 10^{-3}$  |
| N | $2.66 \times 10^{-3}$  | $-3.56 \times 10^{-3}$ | $4.62 \times 10^{-3}$  | O | $4.08 \times 10^{-3}$  | $4.46 \times 10^{-4}$  | $1.17 \times 10^{-3}$  |
| N | $-5.48 \times 10^{-3}$ | $-3.93 \times 10^{-3}$ | $9.15 \times 10^{-3}$  | O | $7.36 \times 10^{-3}$  | $-1.13 \times 10^{-2}$ | $-4.44 \times 10^{-3}$ |
| N | $2.19 \times 10^{-3}$  | $1.21 \times 10^{-2}$  | $-6.60 \times 10^{-3}$ | O | $4.47 \times 10^{-3}$  | $-3.24 \times 10^{-3}$ | $-3.35 \times 10^{-3}$ |
| N | $-1.01 \times 10^{-2}$ | $-1.26 \times 10^{-2}$ | $2.01 \times 10^{-4}$  | O | $-7.87 \times 10^{-3}$ | $8.25 \times 10^{-3}$  | $7.66 \times 10^{-3}$  |
| N | $7.66 \times 10^{-3}$  | $7.62 \times 10^{-3}$  | $-7.54 \times 10^{-3}$ | O | $-2.67 \times 10^{-3}$ | $2.72 \times 10^{-3}$  | $8.59 \times 10^{-4}$  |
| N | $7.70 \times 10^{-3}$  | $-1.09 \times 10^{-2}$ | $-8.73 \times 10^{-3}$ | O | $-4.63 \times 10^{-3}$ | $8.17 \times 10^{-3}$  | $-5.92 \times 10^{-4}$ |
| N | $-5.57 \times 10^{-3}$ | $6.44 \times 10^{-4}$  | $6.77 \times 10^{-3}$  | O | $-4.23 \times 10^{-3}$ | $3.59 \times 10^{-3}$  | $-6.62 \times 10^{-3}$ |
| N | $-1.04 \times 10^{-3}$ | $2.30 \times 10^{-3}$  | $8.06 \times 10^{-3}$  | O | $6.40 \times 10^{-3}$  | $-8.09 \times 10^{-3}$ | $2.50 \times 10^{-3}$  |
| N | $-1.96 \times 10^{-3}$ | $9.80 \times 10^{-3}$  | $-1.43 \times 10^{-2}$ | O | $2.66 \times 10^{-3}$  | $-5.28 \times 10^{-3}$ | $8.94 \times 10^{-4}$  |
| N | $1.06 \times 10^{-3}$  | $-4.63 \times 10^{-3}$ | $-2.44 \times 10^{-3}$ | O | $-9.94 \times 10^{-5}$ | $-4.90 \times 10^{-3}$ | $1.09 \times 10^{-2}$  |

|   |                        |                        |                        |   |                        |                        |                        |
|---|------------------------|------------------------|------------------------|---|------------------------|------------------------|------------------------|
| N | $9.87 \times 10^{-3}$  | $1.21 \times 10^{-2}$  | $4.94 \times 10^{-4}$  | O | $-1.62 \times 10^{-3}$ | $-1.23 \times 10^{-3}$ | $6.09 \times 10^{-4}$  |
| N | $1.13 \times 10^{-3}$  | $-3.36 \times 10^{-3}$ | $-1.33 \times 10^{-2}$ | O | $1.80 \times 10^{-2}$  | $8.60 \times 10^{-4}$  | $5.33 \times 10^{-3}$  |
| N | $-4.28 \times 10^{-3}$ | $-9.65 \times 10^{-4}$ | $2.97 \times 10^{-3}$  | O | $9.91 \times 10^{-4}$  | $-5.13 \times 10^{-4}$ | $3.25 \times 10^{-4}$  |
| N | $4.25 \times 10^{-4}$  | $3.76 \times 10^{-3}$  | $1.06 \times 10^{-2}$  | O | $3.83 \times 10^{-3}$  | $1.13 \times 10^{-2}$  | $-5.13 \times 10^{-3}$ |
| N | $-4.49 \times 10^{-3}$ | $-1.21 \times 10^{-2}$ | $-8.62 \times 10^{-3}$ | O | $8.36 \times 10^{-5}$  | $3.18 \times 10^{-3}$  | $-4.58 \times 10^{-3}$ |
| N | $3.26 \times 10^{-3}$  | $-1.23 \times 10^{-2}$ | $-2.34 \times 10^{-3}$ | O | $4.36 \times 10^{-3}$  | $8.88 \times 10^{-3}$  | $-6.83 \times 10^{-3}$ |
| N | $-3.46 \times 10^{-3}$ | $6.50 \times 10^{-3}$  | $6.98 \times 10^{-3}$  | O | $5.78 \times 10^{-3}$  | $2.68 \times 10^{-3}$  | $-1.98 \times 10^{-4}$ |
| N | $-1.46 \times 10^{-3}$ | $-1.06 \times 10^{-2}$ | $1.03 \times 10^{-2}$  | O | $7.83 \times 10^{-3}$  | $7.80 \times 10^{-3}$  | $1.58 \times 10^{-3}$  |
| N | $-8.39 \times 10^{-4}$ | $5.87 \times 10^{-4}$  | $-8.46 \times 10^{-3}$ | O | $5.10 \times 10^{-4}$  | $3.24 \times 10^{-3}$  | $5.74 \times 10^{-3}$  |
| N | $6.05 \times 10^{-3}$  | $2.45 \times 10^{-3}$  | $-6.94 \times 10^{-3}$ | O | $-3.27 \times 10^{-3}$ | $-7.80 \times 10^{-3}$ | $-1.05 \times 10^{-3}$ |
| N | $-6.10 \times 10^{-3}$ | $9.68 \times 10^{-3}$  | $1.17 \times 10^{-2}$  | O | $-6.44 \times 10^{-3}$ | $-5.65 \times 10^{-3}$ | $-1.98 \times 10^{-3}$ |
| N | $8.30 \times 10^{-3}$  | $-5.57 \times 10^{-3}$ | $6.03 \times 10^{-3}$  | O | $-4.80 \times 10^{-3}$ | $-3.54 \times 10^{-3}$ | $-1.28 \times 10^{-2}$ |
| N | $-5.03 \times 10^{-3}$ | $1.15 \times 10^{-2}$  | $7.01 \times 10^{-4}$  | O | $-2.33 \times 10^{-3}$ | $-1.19 \times 10^{-3}$ | $-1.98 \times 10^{-3}$ |
| N | $8.93 \times 10^{-3}$  | $-3.46 \times 10^{-3}$ | $1.70 \times 10^{-2}$  | O | $-1.38 \times 10^{-2}$ | $8.28 \times 10^{-4}$  | $-5.34 \times 10^{-3}$ |
| N | $-2.84 \times 10^{-3}$ | $-1.11 \times 10^{-3}$ | $-4.67 \times 10^{-3}$ | O | $-4.07 \times 10^{-3}$ | $-4.55 \times 10^{-4}$ | $-1.14 \times 10^{-3}$ |
| N | $5.43 \times 10^{-3}$  | $3.94 \times 10^{-3}$  | $-9.18 \times 10^{-3}$ | O | $-7.34 \times 10^{-3}$ | $1.13 \times 10^{-2}$  | $4.45 \times 10^{-3}$  |
| N | $-2.20 \times 10^{-3}$ | $-1.21 \times 10^{-2}$ | $6.56 \times 10^{-3}$  | O | $-4.41 \times 10^{-3}$ | $3.24 \times 10^{-3}$  | $3.38 \times 10^{-3}$  |

## Section 2 The snapshots of products of RDX and CL-20

### The snapshots of products of RDX

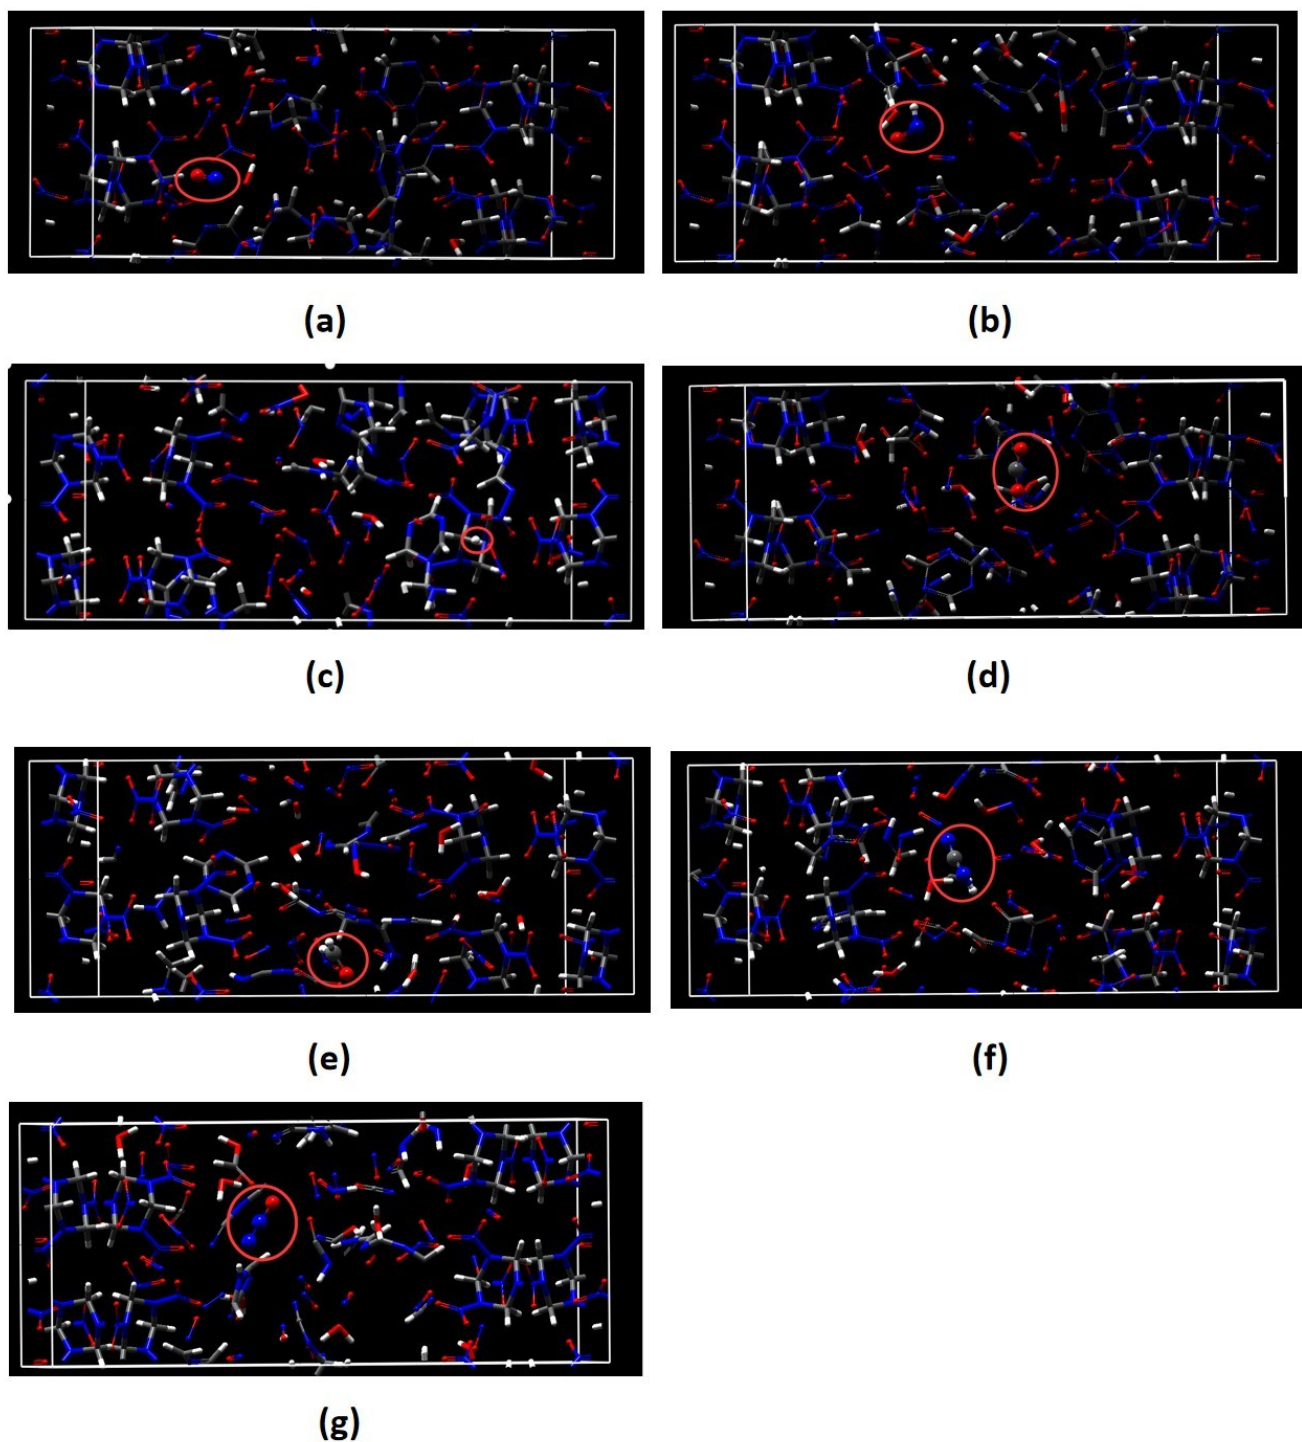

Fig. S1. The snapshots of products of RDX. (a) the formation of NO (38.0512 ps); (b) the formation of HNO at 42.4575 ps; (c) the formation of H<sub>2</sub> at 44.7961 ps; (d) the formation of CO<sub>2</sub> at 44.7961 ps. (e) the formation of CH<sub>2</sub>O at 58.5180ps; (f) the formation of HNCN at 58.5180 ps; (g) the formation of N<sub>2</sub>O at 55.1993 ps.

The snapshots of products of CL-20

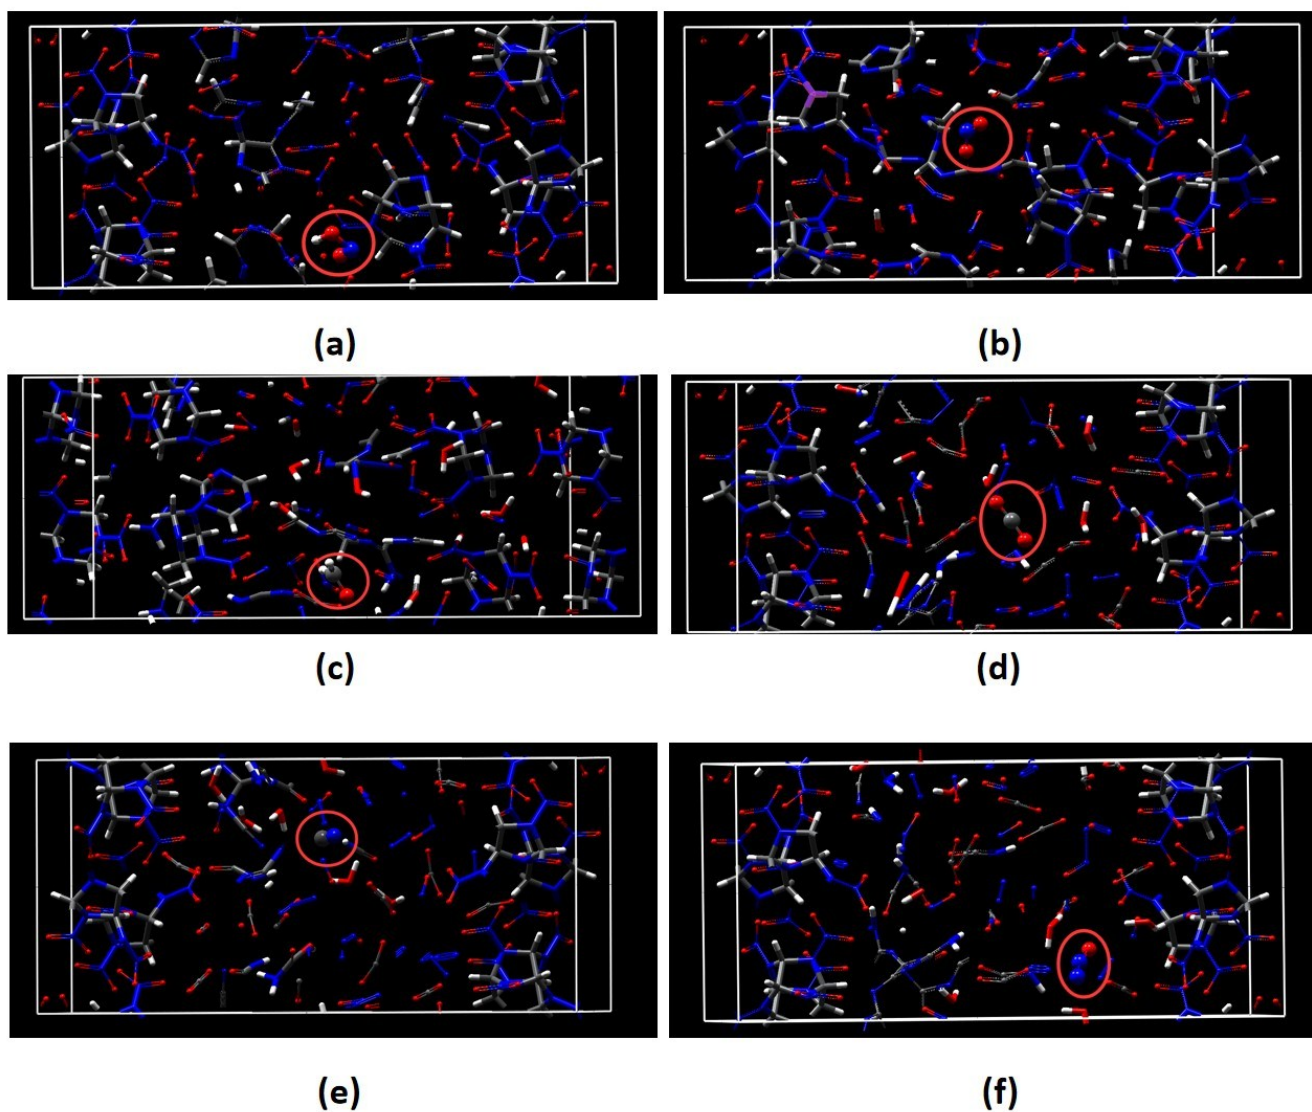

Fig. S2 The snapshots of the products of CL-20. (a) the formation of HONO (30.086 ps); (b) the formation of NO<sub>2</sub> at 29.877 ps; (c) the formation of CH<sub>2</sub>O at 59.564 ps; (d) the formation of CO<sub>2</sub> at 59.564 ps the formation of HCN at 59.564 ps; (e) the formation of N<sub>2</sub>O at 58.5180ps.
